# Supplementary material
Source: publisher figshare collection journal article supplement (https://sage.figshare.com/ndownloader/files/14949287)
Supplement: Supplementary file 1 [file 14949287]

### Supplemental Data 1: Reference surveys reviewed to develop the Workplace Health in America survey

| Surveys                                                                                                        |
|----------------------------------------------------------------------------------------------------------------|
| National Survey of Worksite Health Promotion Activities (1985) <sup>1</sup>                                    |
| National Survey of Worksite Health Promotion Activities (1992) <sup>2</sup>                                    |
| National Worksite Health Promotion Survey (1999) <sup>3</sup>                                                  |
| National Worksite Health Promotion Survey (2004) <sup>4</sup>                                                  |
| The Utah 2005 Worksite Wellness Survey (2005) <sup>5</sup>                                                     |
| HPQ-Select Survey (2008) <sup>6</sup>                                                                          |
| Massachusetts Worksite Health Improvement Survey (2008) <sup>7</sup>                                           |
| The CDC Worksite Health ScoreCard (2012) <sup>8</sup>                                                          |
| Fourth Annual Employer-Sponsored Health Improvement Initiatives Survey (2012) <sup>9</sup>                     |
| Assessment of Organizational Readiness for Workplace Wellness Programs (2013) <sup>10</sup>                    |
| PEACH/Core Employer Survey (2010) <sup>11</sup>                                                                |
| Staying@Work Survey (2013) <sup>12</sup>                                                                       |
| Indicators of Integration (2013) <sup>13</sup>                                                                 |
| National Study of Employers (2014) <sup>14</sup>                                                               |
| Small Business Attitudes on Wellness Programs (2014) <sup>15</sup>                                             |
| The HERO Employee Health Management Best Practices Scorecard in Collaboration with Mercer (2014) <sup>16</sup> |

### References

1. Fielding JE, Piserchia P V. Frequency of Worksite Health Promotion Activities. *Am J Public Health*. 1989;79(1):16-20. <https://ajph.aphapublications.org/doi/pdfplus/10.2105/AJPH.79.1.16>. Accessed August 27, 2018.
2. Biener L, Betrera R, Curtis E. *1992 National Survey of Worksite Health Promotion Activities: Summary Report*. Washington, D.C.; 1993.
3. Association for Worksite Health Promotion, William M Mercer Inc, US Department of Health and Human Services Office of Disease Prevention and Health Promotion. *National Worksite Health Promotion Survey*. Washington, D.C.; 1999.
4. Linnan L, Bowling M, Childress J, et al. Results of the 2004 National Worksite Health Promotion Survey. *Am J Public Health*. 2008;98(8):1503-1509. doi:10.2105/AJPH.2006.100313.
5. Bureau of Health Promotion. *The Utah 2005 Worksite Wellness Survey Report: Measuring the Healthy People 2010 Objective*. Salt Lake City, UT; 2007.
6. Integrated Benefits Institute. HPQ-Select Survey. 2008.
7. Massachusetts Department of Public Health. Massachusetts Worksite Health Improvement Survey. 2008.
8. Centers for Disease Control and Prevention. The CDC Worksite Health ScoreCard: An assessment tool for employers to prevent heart disease, stroke, and related health conditions. *US Dep Heal Hum Serv*. 2014;(January).
9. National Business Group on Health, Fidelity Investments Benefits Consulting. Fourth Annual Employer-Sponsored Health Improvement Initiatives Survey. 2012.

10. Hannon PA, Helfrich CD, Chan KG, et al. Development and Pilot Test of the Workplace Readiness Questionnaire, a Theory-Based Instrument to Measure Small Workplaces' Readiness to Implement Wellness Programs. *Am J Health Promot.* 2017;31(1):67-75. doi:10.4278/ajhp.141204-QUAN-604.
11. Hannon PA, Garson G, Harris JR, Hammerback K, Sopher CJ, Clegg-Thorp C. Workplace health promotion implementation, readiness, and capacity among midsize employers in low-wage industries: a national survey. *J Occup Environ Med.* 2012;54(11):1337-1343. doi:10.1097/JOM.0b013e3182717cf2.
12. US: Towers Watson. *The Business Value of a Healthy Workforce: 2013/2014 Staying@Work Survey Report.*; 2013.
13. Sorensen G, McLellan D, Dennerlein JT, et al. Integration of health protection and health promotion: rationale, indicators, and metrics. *J Occup Environ Med.* 2013;55(12 Suppl):S12-8. doi:10.1097/JOM.0000000000000032.
14. Matos K, Galinsky E. *National Study of Employers.*; 2014.
15. Small Business Majority. *Small Business Attitudes Towards Wellness Programs.* Washington, D.C.; 2014.
16. HERO, Mercer. The HERO Employee Health Management Best Practices Scorecard in Collaboration with Mercer: Version 4. 2014:1-32.
